# Supplementary material for: Novel superwetting nanofibrous skins for removing stubborn soluble oil in emulsified wastewater
Source: Royal Society of Chemistry journal article supplement (doi:10.1039/d1ta08628f), 2021-01-01
Supplement: d1ta08628f1.pdf [file d1ta08628f1.pdf]

## Electronic Supporting Information

### Novel superwetting nanofibrous skins for removing stubborn soluble oil in emulsified wastewater

Xiangyu Li,<sup>‡a</sup> Qilin Gui,<sup>‡b</sup> Yen Wei<sup>a</sup> and Lin Feng<sup>\*a</sup>

<sup>a</sup> *Department of Chemistry, Tsinghua University, Beijing, 100084, P. R. China*

<sup>b</sup> *Aerospace Research Institute of Materials and Processing Technology, Beijing, 100074, P.  
R. China*

<sup>‡</sup> *These authors contributed equally to this work.*

<sup>\*</sup> *Corresponding author, E-mail: fl@mail.tsinghua.edu.cn*

## **The PDF file includes:**

Fig. S1. The vernier caliper measurement of the substrate.

Fig. S2. Cross-sectional SEM images of the PNVF@PPM.

Fig. S3. Porosity of the PPM and PNVF@PPM.

Fig. S4. SEM images of the PNVF@PPMs with different grafting ratios.

Fig. S5. Atomic concentration of PNVF@PPM.

Fig. S6. High-resolution XPS spectra of the pristine PPM and PNVF@PPM.

Fig. S7. The water resisting property of the PNVF@PPM.

Fig. S8. The underwater oil wettability of the pristine PPM.

Fig. S9. Atmospheric durability tests of the PNVF@PPM.

Fig. S10. Adsorption performance of PNVF@PPM, PAA@PPM, and PAM@PPM.

Fig. S11. FTIR spectra of the PAA@PPM and PAM@PPM.

Fig. S12. Digital images of various emulsions before and after the membrane separation.

Table S1. Evaluation of the hydrophobicity of the grafting monomers.

Table S2. Summary of the properties of the oils.

Table S3. Performance comparison of oil-in-water emulsion separation.

References

## Supplementary Figures

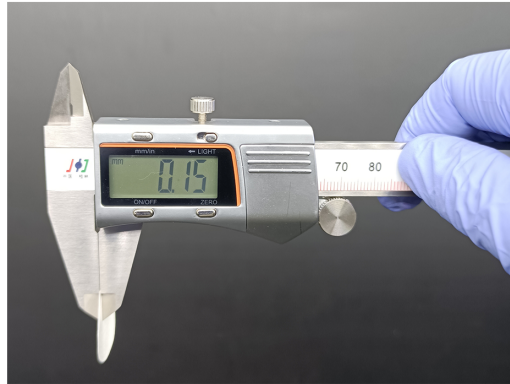

**Fig. S1** The vernier caliper measurement of the substrate, indicating that the membrane thickness is about 150  $\mu\text{m}$ .

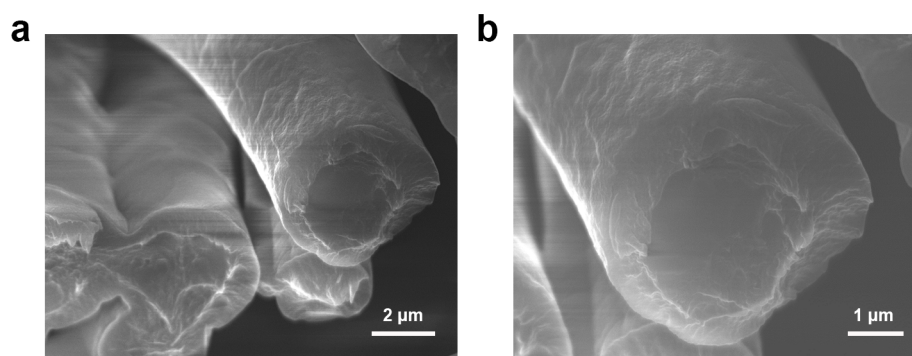

**Fig. S2** (a) Low-magnification and (b) high-magnification cross-sectional SEM images of the PNVF@PPM, indicating the successful coverage of the PNVF skin layer on the membrane surface.

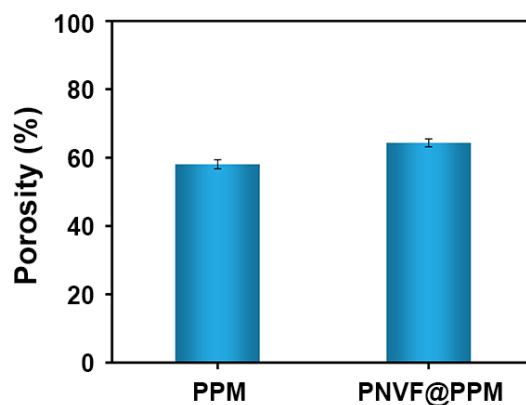

**Fig. S3** Porosity ( $\varepsilon$ ) of the PPM and PNVF@PPM. The values were measured by using n-butanol uptake tests according to the following equation

$$(\varepsilon(\%)) = \frac{M_{\text{BuOH}} / \rho_{\text{BuOH}}}{(M_{\text{BuOH}} / \rho_{\text{BuOH}}) + (M_{\text{m}} / \rho_{\text{PNVF}})} \times 100\% ,$$

where  $M_{\text{BuOH}}$  represents the n-butanol mass absorbed by the testing membrane,  $\rho_{\text{BuOH}}$  is the density of n-butanol,  $M_{\text{m}}$  is the mass of the sufficiently dried membrane, and  $\rho_{\text{PNVF}}$  is the density of the grafting PNVF).<sup>1,2</sup>

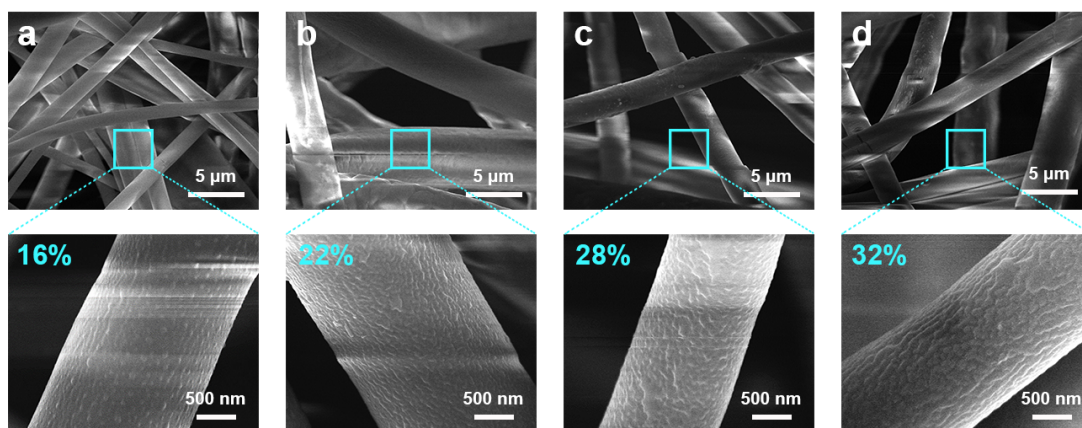

**Fig. S4** Low and high-magnification SEM images of the obtained PNVF@PPMs with different grafting ratios of (a) 16%, (b) 22%, (c) 28%, and (d) 32%, respectively.

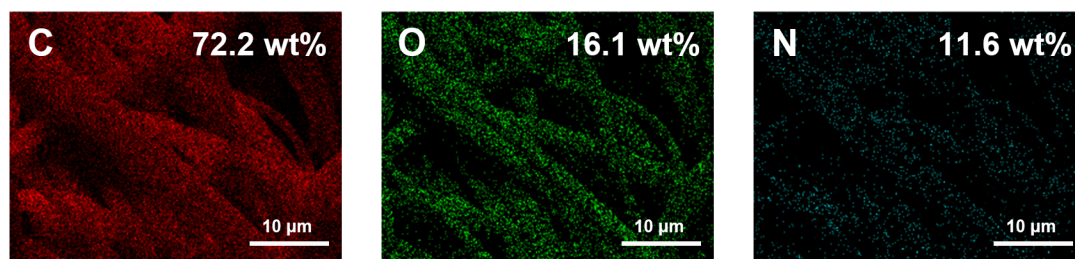

**Fig. S5** Atomic concentration of PNVF@PPM. The EDX mapping clearly discerns the additional presence of O and N elements compared with the PPM substrate.

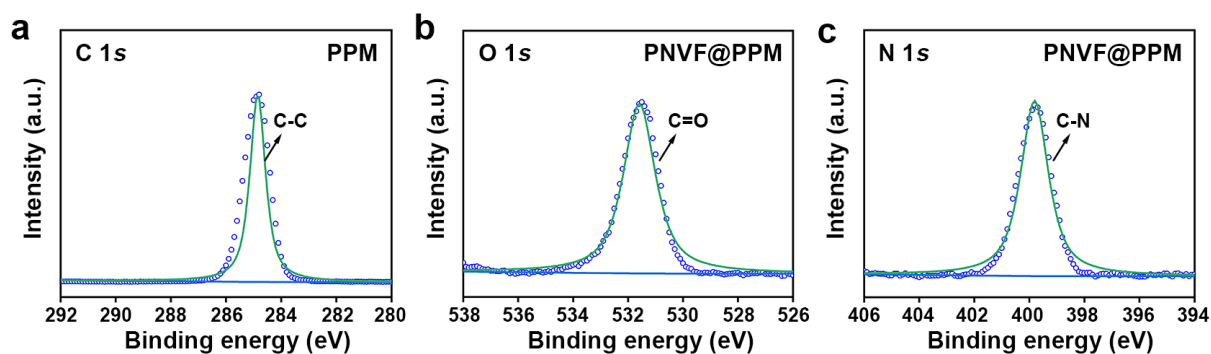

**Fig. S6** High-resolution XPS spectra for different elements of the membrane before and after the modification. (a) The high-resolution XPS spectrum of C 1s for the pristine PPM, indicating the sole C-C moiety on the surface. The high-resolution XPS spectra of (b) O 1s and (c) N 1s spectra for PNVF@PPM showing the C=O and C-N moieties on the surface layer, respectively.



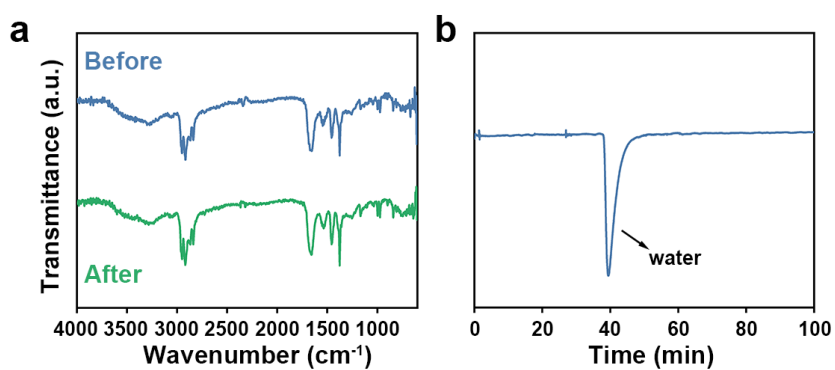

**Fig. S7** The water resisting property of the PNVF@PPM. (a) FTIR spectra of the PNVF@PPM before and after water immersion for three days. (b) GPC measurement of the remaining water after the above treatment, indicating that no PNVF from the membrane falls off and dissolves in the water.

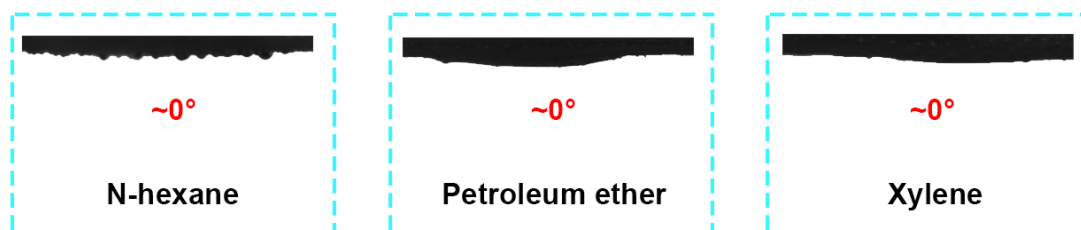

**Fig. S8** The underwater oil wettability of the pristine PPM, indicating the superoleophilicity of the substrate.

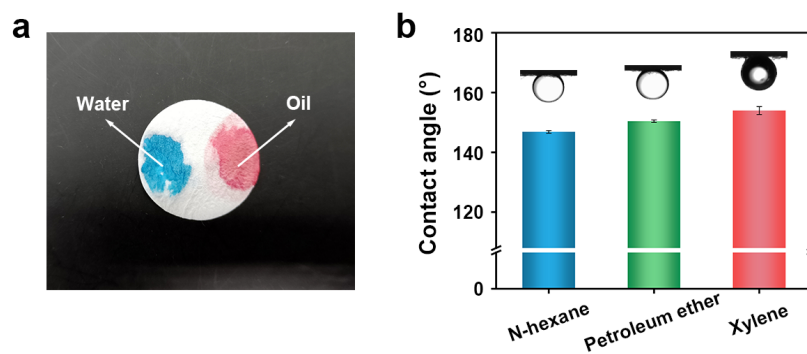

**Fig. S9** Atmospheric durability tests of the PNVF@PPM. (a) Digital images of the water and oil (xylene) droplets on the membrane exposed to air for one month. (b) The corresponding underwater oil contact angles of the membrane after the treatment.

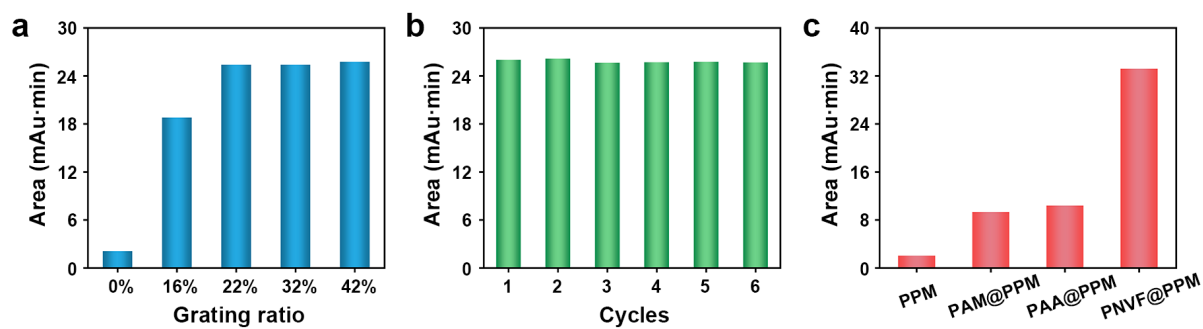

**Fig. S10** The demonstration of adsorption performance of a series of membranes. (a) Adsorption capability of the PNVF@PPM with different grafting ratios for wastewater sample (xylene concentration at  $200 \text{ mg L}^{-1}$ ). (b) Cyclic adsorption capability of the PNVF@PPM with 42% grafting ratios for wastewater sample. (c) Adsorption capability of the PNVF@PPM, PAA@PPM, and PAM@PPM ( $\sim 40\%$  grafting ratio of three kinds of membranes) for wastewater sample.

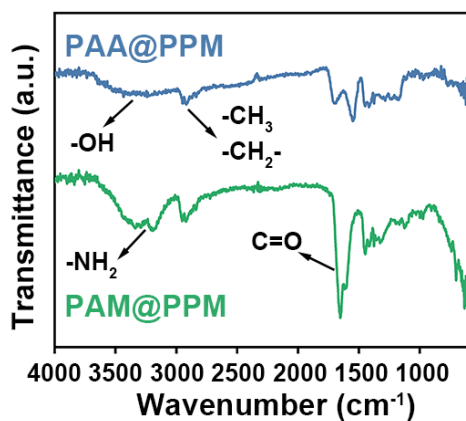

**Fig. S11** FTIR spectra of the PAA@PPM and PAM@PPM. The broad peak at 3389 cm<sup>-1</sup> ascribed to -OH verifies the existence of polyacrylic acid on the membrane surface. Likewise, the peaks at 3196 and 3342 cm<sup>-1</sup> ascribed to -NH<sub>2</sub> symmetric and antisymmetric stretching vibration verify the polyacrylamide structure on the other membrane surface.

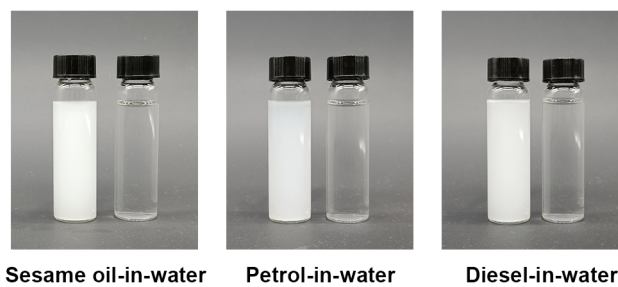

**Fig. S12** Digital images of the sesame oil-in-water, petrol-in-water, diesel-in-water emulsions before and after the membrane separation.

## Supplementary Tables

**Table S1.** Evaluation of the hydrophobicity of the grafting monomers.

| Monomer        | AA    | AM    | NVF  |
|----------------|-------|-------|------|
| $\log P^{(a)}$ | -2.56 | -0.56 | 0.53 |

<sup>(a)</sup>  $\log P$  represents the oil-water partition coefficient to evaluate the hydrophobicity of the compounds. The data of  $\log P$  were obtained from the SciFinder Database.

**Table S2.** Summary of the properties of the oils.

| Oils <sup>(a)</sup> | Viscosity (mPa. s) | Density (g cm <sup>-3</sup> ) | Surface tension (mN m <sup>-1</sup> ) |
|---------------------|--------------------|-------------------------------|---------------------------------------|
| N-hexane            | 0.3                | 0.66                          | 18.8                                  |
| Petroleum ether     | 0.3                | 0.66                          | 18.4                                  |
| Xylene              | 0.7                | 0.86                          | 30.7                                  |
| Sesame oil          | 52.5               | 0.92                          | 28.1                                  |
| Petrol              | 0.8                | 0.73                          | 21.6                                  |
| Diesel              | 2.9                | 0.84                          | 26.8                                  |

<sup>(a)</sup> The data of the properties of the oils (at 20°C if unspecified) were obtained from the literature.



**Table S3.** Performance comparison of the PNVF@PPM with other recently reported filtration membranes for oil-in-water emulsion separation.

| Membrane                                                      | Pressure       | Emulsion type            | Flux<br>(L m <sup>-2</sup> h <sup>-1</sup> ) | Separation efficiency | Residual oil content<br>(mg L <sup>-1</sup> ) | Reference        |
|---------------------------------------------------------------|----------------|--------------------------|----------------------------------------------|-----------------------|-----------------------------------------------|------------------|
| Composite nanofibrous membrane                                | 0.005 MPa      | N-hexane-in-water        | 692                                          | 99.40%                | 23                                            | 3                |
| ZNG-g-PVDF membrane                                           | 0.01 MPa       | Isooctane-in-water       | 2500                                         | 99.80%                | 19                                            | 4                |
| TiO <sub>2</sub> @PSA/PAN membrane                            | 0.01 MPa       | N-hexane-in-water        | 3264                                         | 99.60%                | 40                                            | 5                |
| GO/g-C <sub>3</sub> N <sub>4</sub> @TiO <sub>2</sub> membrane | 0.05 MPa       | Soybean oil-in-water     | 158                                          | 99.90%                | /(a)                                          | 6                |
| PVDF@PDA@SiO <sub>2</sub> membrane                            | 0.08 MPa       | Dichloroethane-in-water  | 458                                          | 99.91%                | 19                                            | 7                |
| WBP@PBDF membrane                                             | 0.085 MPa      | N-hexane-in-water        | 814                                          | 99.40%                | 75                                            | 8                |
| PNIPAAm modified membrane                                     | 0.1 MPa        | N-hexane-in-water        | 2200                                         | 99.30%                | 60                                            | 9                |
| Lithium exchanged vermiculite membrane                        | 0.1 MPa        | N-hexane-in-water        | 6500                                         | 95.40%                | /                                             | 10               |
| GO/PG/CN@BOC membrane                                         | ~0.1 MPa       | N-hexane-in-water        | 450                                          | 99.90%                | /                                             | 11               |
| Vitrimer epoxy resin membranes                                | ~0.1 MPa       | Heptane-in-water         | 1.36×10 <sup>7</sup>                         | 98.00%                | 130                                           | 12               |
| Hydrogel coated filter paper                                  | Gravity        | N-hexane-in-water        | 63                                           | 99.40%                | /                                             | 13               |
| PFOA@TiO <sub>2</sub> coated membrane                         | Gravity        | Toluene-in-water         | 400                                          | /                     | 150                                           | 14               |
| Reduced PK membrane                                           | Gravity        | Soybean oil-in-water     | 497                                          | 99.80%                | 20                                            | 15               |
| NiCo-LDH/PVDF membrane                                        | Gravity        | Dichloroethane-in-water  | 600                                          | 99.70%                | 40                                            | 16               |
| Three-dimensional attapulgite                                 | Gravity        | N-hexane-in-water        | 218                                          | 99.60%                | 60                                            | 17               |
| SiO <sub>2</sub> @PAN nanofibrous membrane                    | Gravity        | N-hexane-in-water        | 1120                                         | /                     | 50                                            | 18               |
| <b>PNVF@PPM</b>                                               | <b>Gravity</b> | <b>N-hexane-in-water</b> | <b>1396</b>                                  | <b>&gt;99.99%</b>     | <b>&lt;0.5</b>                                | <b>This work</b> |

(a) /: Not provided

## Supplementary References

1. Y. Zhai, K. Xiao, J. Yu, J. Yang and B. Ding, *J. Mater. Chem. A*, 2015, **3**, 10551-10558.
2. M. Wu, W. Liu, P. Mu, Q. Wang and J. Li, *ACS Appl. Mater. Interfaces*, 2020, **12**, 53484-53493.
3. J. Ge, D. Zong, Q. Jin, J. Yu and B. Ding, *Adv. Funct. Mater.*, 2018, **28**, 1705051.
4. Y. Zhu, J. Wang, F. Zhang, S. Gao, A. Wang, W. Fang and J. Jin, *Adv. Funct. Mater.*, 2018, **28**, 1804121.
5. Z. Zhu, W. Wang, D. Qi, Y. Luo, Y. Liu, Y. Xu, F. Cui, C. Wang and X. Chen, *Adv. Mater.*, 2018, **30**, 1801870.
6. Y. Liu, Y. Su, J. Guan, J. Cao, R. Zhang, M. He, K. Gao, L. Zhou and Z. Jiang, *Adv. Funct. Mater.*, 2018, **28**, 1706545.
7. J. Cui, Z. Zhou, A. Xie, M. Meng, Y. Cui, S. Liu, J. Lu, S. Zhou, Y. Yan and H. Dong, *Sep. Purif. Technol.*, 2019, **209**, 434-442.
8. G. Shi, Y. Shen, P. Mu, Q. Wang, Y. Yang, S. Ma and J. Li, *Green Chem.*, 2020, **22**, 1345-1352.
9. W. Zhang, N. Liu, Q. Zhang, R. Qu, Y. Liu, X. Li, Y. Wei, L. Feng and L. Jiang, *Angew. Chem. Int. Ed.*, 2018, **57**, 5740-5745.
10. K. Huang, P. Rowe, C. Chi, V. Sreepal, T. Bohn, K.-G. Zhou, Y. Su, E. Prestat, P. Balakrishna Pillai, C.T. Cherian, A. Michaelides and R. R. Nair, *Nat. Commun.* 2020, **11**, 1097.
11. Y. Cai, D. Chen, N. Li, Q. Xu, H. Li, J. He and J. Lu, *Adv. Mater.*, 2020, **32**, 2001265.
12. C. Ye, V. S. D. Voet, R. Folkersma and K. Loos, *Adv. Mater.*, 2021, **33**, 2008460.
13. J. Fan, Y. Song, S. Wang, J. Meng, G. Yang, X. Guo, L. Feng and L. Jiang, *Adv. Funct. Mater.*, 2015, **25**, 5368-5375.
14. Y. Sun and Z. Guo, *Adv. Mater.*, 2020, **32**, 2004875.

15. L. Cheng, A. R. Shaikh, L.-F. Fang, S. Jeon, C.-J. Liu, L. Zhang, H.-C. Wu, D.-M. Wang and H. Matsuyama, *ACS Appl. Mater. Interfaces*, 2018, **10**, 44880-44889.
16. J. Cui, Z. Zhou, A. Xie, Q. Wang, S. Liu, J. Lang, C. Li, Y. Yan and J. Dai, *J. Membr. Sci.*, 2019, **573**, 226-233.
17. M. Cui, P. Mu, Y. Shen, G. Zhu, L. Luo and J. Li, *Sep. Purif. Technol.*, 2020, **235**, 116210.
18. J. Ge, J. Zhang, F. Wang, Z. Li, J. Yu and B. Ding, *J. Mater. Chem. A*, 2017, **5**, 497-502.
